# Supplementary material for: Efficient and Selective Removal of Organic Cationic Dyes by Peel of Brassica juncea Coss. var. gemmifera Lee et Lin-Based Biochar
Source: MDPI journal article supplement (doi:10.3390/molecules28083353), 2023-04-11
Supplement: s1 [file s1]

**Efficient and selective removal of organic cationic dyes by peel of *Brassica juncea* Coss. var. *gemmifera* Lee et Lin-based biochar**

Tao-Tao Shi<sup>1</sup>, Xin-Yu Jiang<sup>1</sup>, Jin-Gang Yu<sup>1,\*</sup>

<sup>1</sup>*College of Chemistry and Chemical Engineering, Central South University, Changsha, Hunan 410083, China*

**1. Adsorption kinetics**

Two couples of kinetic models were used to fit the experimental data of contact time on MB adsorbed onto the biochar derived from PoBJ. The first models, nonlinear pseudo-first-order models, could be expressed as follows:

$$q_t = q_e(1 - e^{-k_1 t}) \quad (1)$$

The second models, nonlinear pseudo-second-order models, could be expressed as follows:

$$q_t = \frac{k_2 q_e^2 t}{1 + k_2 q_e t} \quad (2)$$

where  $t$  (min) is the contact time;  $q_e$  (mg/g) and  $q_t$  (mg/g) are the amounts of MB adsorbed at equilibrium and at time  $t$ , respectively;  $k_1$  ( $\text{min}^{-1}$ ) and  $k_2$  ( $\text{g}/(\text{mg} \cdot \text{min})$ ) are the specific adsorption rate constants of the pseudo first-order model and the pseudo second order models, respectively.

---

To whom correspondence should be addressed.

\* JG Yu, E-mail: [yujg@csu.edu.cn](mailto:yujg@csu.edu.cn); Tel/Fax: +86-731-88879616.

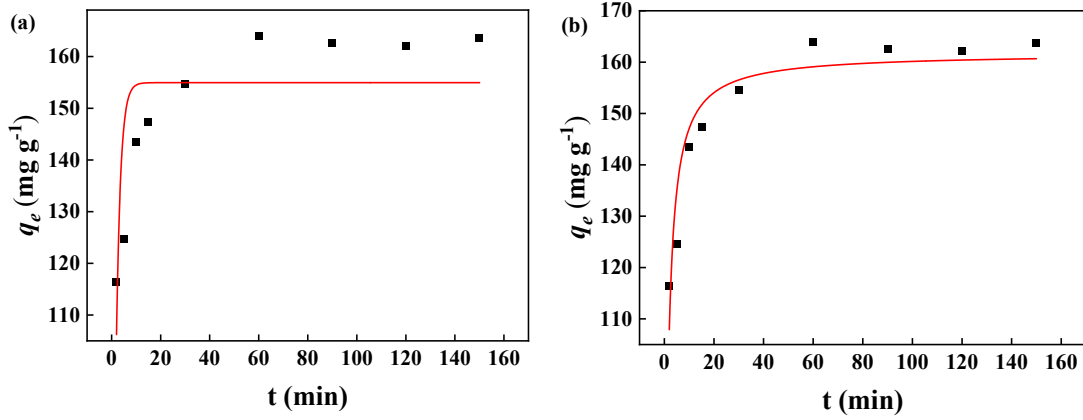

**Figure S1** (a) Fitted adsorption kinetic curves by nonlinear pseudo-first-order models; (b) Fitted adsorption kinetic curves by nonlinear pseudo-second-order models.

**Table S1** Adsorption kinetic parameters for the adsorption of MB onto BJ160.

| Fitting parameters                       | Non-linear pseudo-first-order model | Non-linear pseudo-second-order model |
|------------------------------------------|-------------------------------------|--------------------------------------|
| $R^2$                                    | 0.537                               | 0.885                                |
| $k_1 (\text{min}^{-1})$                  | 0.579                               | -                                    |
| $k_2 (\text{g mg}^{-1} \text{min}^{-1})$ | -                                   | 0.0062                               |
| $q_e (\text{mg/g})$                      | 154.9                               | 161.7                                |

## 2. Adsorption isotherms and thermodynamics

Two isothermal models were used to fit the experimental data of MB adsorbed on BJ160.

Langmuir model:

$$q_e = \frac{q_m k_L C_e}{1 + k_L C_e} \quad (3)$$

where  $C_e$  (mg/L) is the equilibrium concentration;  $q_e$  (mg/g) is the amount of adsorbed species per specified amount of adsorbent;  $K_L$  is the Langmuir equilibrium constant and  $q_m$  (mg/g) is the amount of adsorbate required to form an adsorbed monolayer.

Freundlich model:

$$q_e = k_F C_e^{\frac{1}{n}} \quad (4)$$

where  $C_e$  (mg/L) is the equilibrium concentration of adsorbent;  $q_e$  (mg/g) is the amount of adsorbent per unit mass;  $K_F$  and  $n$  are two Freundlich constants:  $n$  represents the relative advantage of adsorption process;  $K_F$  is the affinity constant which is related to the adsorption capacity of the adsorbent and can also be defined as adsorption or distribution coefficient, indicating the amount of dye adsorbed on BJ160 at equilibrium concentration.

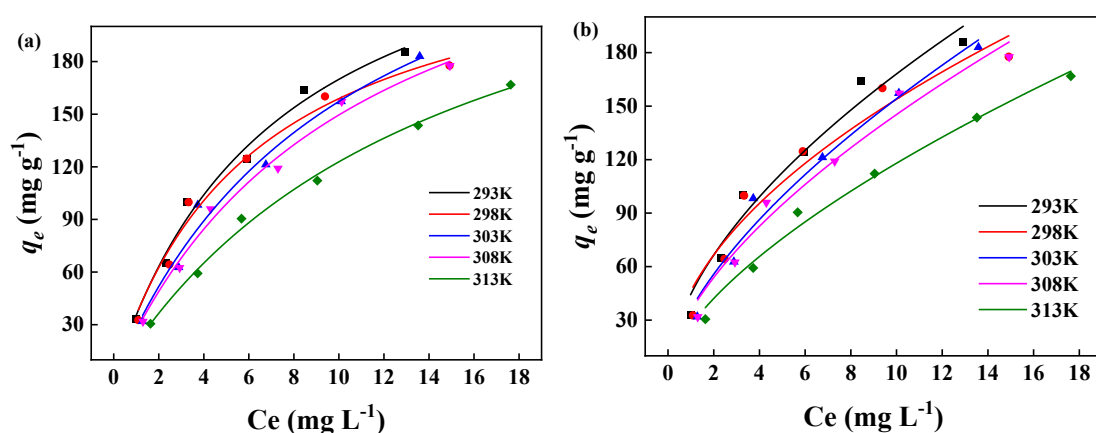

**Figure S2** (a)The experimental data of BJ160 toward MB and the fitting curves of Langmuir isotherm model; (b) The experimental data of BJ160 toward MB and the fitting curves of Freundlich isotherm model.

**Table S2** Adsorption isothermal parameters for the adsorption of MB onto BJ160.

| Model      | Fitting parameters | 293K  | 298K  | 303K  | 308K  | 313K  |
|------------|--------------------|-------|-------|-------|-------|-------|
| Langmuir   | $R^2$              | 0.984 | 0.979 | 0.979 | 0.987 | 0.995 |
|            | $k_L$              | 0.14  | 0.16  | 0.096 | 0.095 | 0.069 |
|            | $q_m$ (mg/g)       | 293.9 | 258.2 | 320.1 | 307.5 | 300.1 |
| Freundlich | $R^2$              | 0.960 | 0.931 | 0.967 | 0.967 | 0.987 |
|            | $k_F$              | 44.61 | 46.37 | 35.99 | 35.17 | 27.05 |
|            | $n$                | 1.74  | 1.92  | 1.58  | 1.62  | 1.56  |

Thermodynamic parameters including enthalpy ( $\Delta H^\circ$ , kJ/mol), entropy ( $\Delta S^\circ$ , J/(K·mol)) and Gibbs free energy ( $\Delta G^\circ$ , kJ/mol) of the adsorption process can be calculated by **Eq. (9-11)**.

$$K_{eq}^\circ = \frac{K_L}{\gamma_{Adsorbate}} \times C^\circ \quad (5)$$

$$\ln K_{eq}^\circ = \frac{-\Delta G^\circ}{RT} = \frac{\Delta S^\circ}{R} - \frac{\Delta H^\circ}{RT} \quad (6)$$

$$\Delta G^\circ = \Delta H^\circ - T\Delta S^\circ \quad (7)$$

where  $K_{eq}^\circ$  is the thermodynamic equilibrium constant;  $K_L$  is the Langmuir equilibrium constant;  $C^\circ = 1 \text{ mol/L}$ ;  $\gamma_{Adsorbate}$  is the activity coefficient of the adsorbent;  $T$  (K) is the absolute temperature and  $R$  (8.314 J/(mol·K)) is the ideal gas constant.

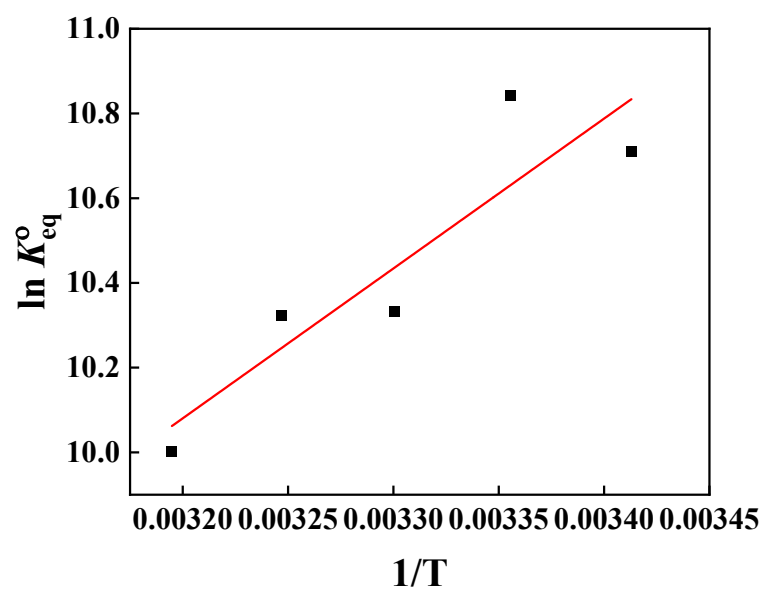

**Figure S3** Experimental data and the fitted curve of  $\ln K_{eq}^{\circ}$  versus  $1/T$  calculated from van't Hoff plots of adsorption of MB onto BJ160.

**Table S3** Thermodynamic parameters of the adsorption of MB onto BJ160.

| $T$ (K) | $\Delta G^{\circ}$ (kJ/mol) | $\Delta H^{\circ}$ (kJ/mol) | $\Delta S^{\circ}$ (J/(K·mol)) |
|---------|-----------------------------|-----------------------------|--------------------------------|
| 293K    | -26.39                      | -29.42                      | -10.33                         |
| 298K    | -26.34                      |                             |                                |
| 303K    | -26.29                      |                             |                                |
| 308K    | -26.24                      |                             |                                |
| 313K    | -26.18                      |                             |                                |
